# Supplementary material
Source: publisher figshare collection journal article supplement (https://gsapubs.figshare.com/ndownloader/files/30419331)
Supplement: Supplementary file 1 [file 30419331]

## Sheet: Ark1
TABLE S2: ID-TIMS U-Pb data
No.	Characteristics1	Weight2	U3	Th/U3	Pbc4	206Pb/204Pb5	207Pb/235U6	± 2s	206Pb/238U6	± 2s	rho	207Pb/206Pb6	± 2s	206Pb/238U6	± 2s	207Pb/235U6	± 2s	207Pb/206Pb6	± 2s	D7
		[mg]	[ppm]		[pg]			[abs]		[abs]			[abs]		[abs]		[abs]		[abs]	[%]
V1 (TGR16_305); trachytic lava flow or dome in Gragjelfjellet unit (UTM32 545428/ 6976995)
1	Z eu eq CA [5]	17	209.798	0.509495	1.22162	13593.3	0.592737	0.00161611	0.0760964	0.000171626	0.902845	0.0564933	6.7245e-05	472.78	1.02805	472.614	1.02977	471.809	2.61255	-0.213496
2	Z eu eq CA [1]	1	865.008	0.522322	0.40008	10062.9	0.592166	0.00251549	0.0760314	0.000275493	0.924518	0.0564872	9.30529e-05	472.391	1.65024	472.25	1.60294	471.568	3.62354	-0.181001
3	Z eu tips CA [2]	16	299.739	0.527378	1.94207	11490.1	0.592151	0.00149433	0.0760267	0.00015672	0.902065	0.0564892	6.27142e-05	472.363	0.938818	472.241	0.952566	471.647	2.44238	-0.157375
4	Z eu eq CA [5]	21	195.027	0.502978	2.74831	6952.46	0.59156	0.00210127	0.0761502	0.000177857	0.762155	0.0563412	0.000131243	473.103	1.06531	471.863	1.33967	465.839	5.13501	-1.61718
5	Z eu eq CA [1]	18	114.625	0.469019	1.58174	6041.53	0.588697	0.00179158	0.075568	0.000153467	0.752535	0.0565005	0.000114181	469.614	0.91975	470.035	1.1444	472.092	4.44434	0.544201
V2 (TGR14_223) trachytic tuff, Jorlisætra unit at the base of Fjellvollen Formation (UTM32 543908/6981628)
6	Z eu tip CA [1]	19	107.26	0.941382	0.887192	10696.5	0.591951	0.0015634	0.0760776	0.000153881	0.845601	0.0564323	8.04444e-05	472.668	0.921788	472.113	0.996669	469.417	3.13306	-0.718274
7	Z fr CA [3]	9	379.345	0.900028	1.318	11979.2	0.587695	0.00164347	0.0755678	0.000160796	0.839835	0.0564045	8.65249e-05	469.613	0.963674	469.395	1.0505	468.328	3.37329	-0.284571
8	Z eu eq b AA [1]	1	10816.7	0.590668	10.1593	4921	0.587895	0.0112919	0.0753569	0.0014382	0.996856	0.0565816	8.61798e-05	468.349	8.61576	469.522	7.19507	475.261	3.34326	1.50789
9	Z eu eq b-cl AA [1]	1	3582.24	0.717004	19.3103	851.779	0.573566	0.00308846	0.0735059	0.000277494	0.736925	0.0565926	0.00020628	457.243	1.66614	460.318	1.99096	475.694	8.02783	4.01788
V3 (TGR15_408); trachytic lava, Bolhøgdin unit, Fjellvollen Formation (UTM32 549906/ 6984286)
10	Z fr CA [1]	1	2701.14	0.701475	2.04249	6148.84	0.58972	0.00276045	0.0758638	0.000295075	0.880224	0.056378	0.000125911	471.387	1.76782	470.689	1.76161	467.286	4.9248	-0.910131
11	Z eu sp CA [1]	1	1236.42	0.704155	1.10507	5195.03	0.593197	0.00258758	0.0757183	0.000288982	0.944315	0.0568194	8.3347e-05	470.515	1.73154	472.907	1.64779	484.532	3.22314	2.9997
12	Z fr CA [1]	1	885.049	0.76356	1.06874	3837.63	0.58852	0.00256319	0.0754748	0.000279976	0.881766	0.0565533	0.000116416	469.055	1.67798	469.922	1.63708	474.159	4.53442	1.11589
13	Z fr CA [2]	1	1164.23	0.788625	0.462552	11618.6	0.589399	0.00249318	0.0754262	0.000277196	0.93786	0.0566743	8.48225e-05	468.764	1.66137	470.484	1.59152	478.882	3.2832	2.19044
14	Z fr CA [2]	1	1586.2	0.521329	2.37979	3081.09	0.586462	0.00188123	0.0751972	0.000198258	0.88032	0.0565636	8.67228e-05	467.391	1.18857	468.606	1.20332	474.561	3.37329	1.56631
C1 (TGR_441), granodioritic clast in Skjøla conglomerate (UTM32 571303/ 7021347)
15	Z eu fr CA [5]	2	550.924	0.744292	1.04046	5159.4	0.608464	0.00222308	0.0775032	0.000197564	0.835172	0.0569395	0.000117936	481.202	1.18186	482.591	1.40241	489.193	4.54443	1.69515
16	Z eu sp CA [1]	1	614.209	0.625281	0.709802	4191.55	0.601201	0.00251584	0.0769937	0.000239914	0.850486	0.0566322	0.000127155	478.153	1.43585	477.996	1.59413	477.24	4.93481	-0.198482
17	Z eu fr CA [2]	1	559.18	0.757433	0.640955	4221.42	0.599328	0.00232224	0.0769144	0.000209607	0.83167	0.0565139	0.000124797	477.679	1.2546	476.807	1.47327	472.615	4.86475	-1.11161
1) Z = zircon; eu = euhedral; eq = equant; sp = short prismatic (l/w = 2-4); fr = fragment; cl = colourless; b = brown; [N] = number of grains in fraction; CA = chemical abrasion; AA = air abrasion
2) weight and concentrations are known to better than 10%, except for those near and below the ca. 1 mg limit of resolution of the balance.
3) Th/U model ratio inferred from 208/206 ratio and age of sample.
4) Pbc = total common Pb in sample (initial + blank).
5) raw data corrected for fractionation and blank.
6) corrected for fractionation, spike, blank and initial common Pb; error calculated by propagating the main sources of uncertainty.
7) D = degree of discordancy
